# Supplementary material for: Design strategies of rare-earth luminescent complexes with zero thermal quenching protected by the wire-in-tube structure and the construction of a W-WLED with highly stable illumination and colour reproduction
Source: Royal Society of Chemistry journal article supplement (doi:10.1039/d4tc02599g), 2024-01-01
Supplement: d4tc02599g1.pdf [file d4tc02599g1.pdf]

## Supporting Information

### Design Strategies of Rare-Earth Luminescent Complexes with Zero-Thermal-Quenching Protected by Wire-in-Tube and the Construction of W-WLED with Highly Stable Illumination and Colour Reproduction

*Yunxiao Ma,<sup>a</sup> Hui Yu,<sup>\*a</sup> Zhijia Lv,<sup>\*b</sup> Xin Guan,<sup>a</sup> Jiabao Yu,<sup>a</sup> Shuang Ma,<sup>a</sup> Long Xia,<sup>\*c</sup> Xiangting Dong,<sup>\*a</sup>*

*Yunxiao Ma, Hui Yu\*, Xin Guan, Jiabao Yu, Shuang Ma, Xiangting Dong\**

School of Chemistry & Environmental Engineering, Changchun University of Science and Technology, Changchun 130022, P. R. China

E-mail: [yuhui@cust.edu.cn](mailto:yuhui@cust.edu.cn)

*Zhijia Lv*

Inner Mongolia Academy of Science and Technology, Hohhot 010012, P. R. China.

E-mail: [lvzhijia1995@163.com](mailto:lvzhijia1995@163.com)

*Long Xia*

School of Materials Science and Engineering, Harbin Institute of Technology (Weihai), Weihai 264209, P. R. China

E-mail: [xialong@hit.edu.cn](mailto:xialong@hit.edu.cn)

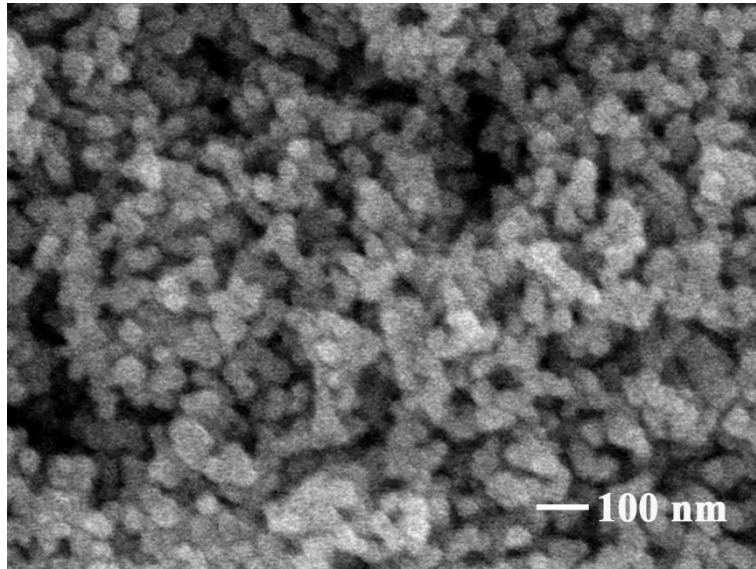

**Fig. S1** The SEM image of  $Z_1S_1$  precursor.

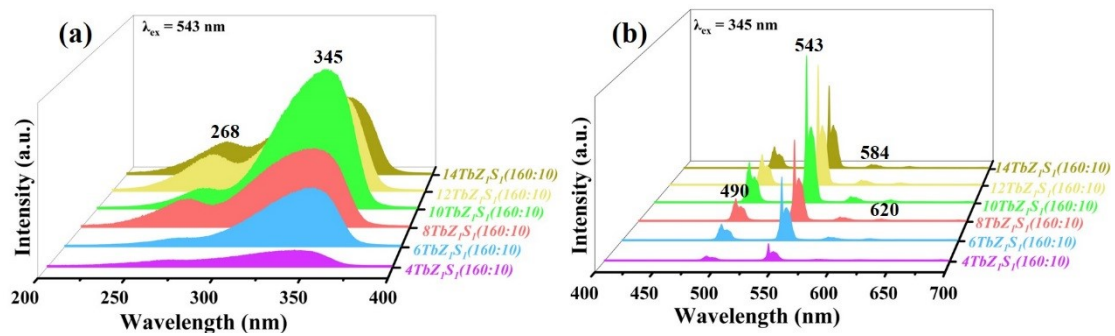

Fig. S2 The excitation spectrum (a) and emission spectrum (b) of  $m\text{TbZ}_1\text{S}_1(160-10)$ ,  $m=4-14$ .

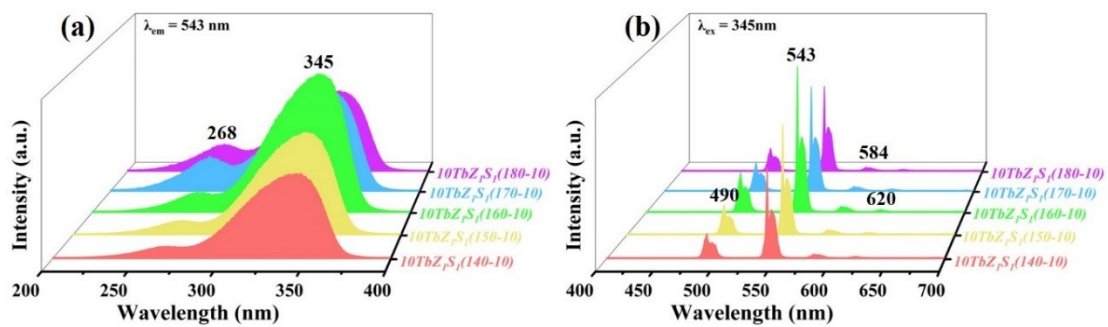

**Fig. S3** The excitation spectrum (a) and emission spectrum (b) of  $10\text{TbZ}_1\text{S}_1(\text{T}-10)$ ,  $\text{T}=140-180$ .

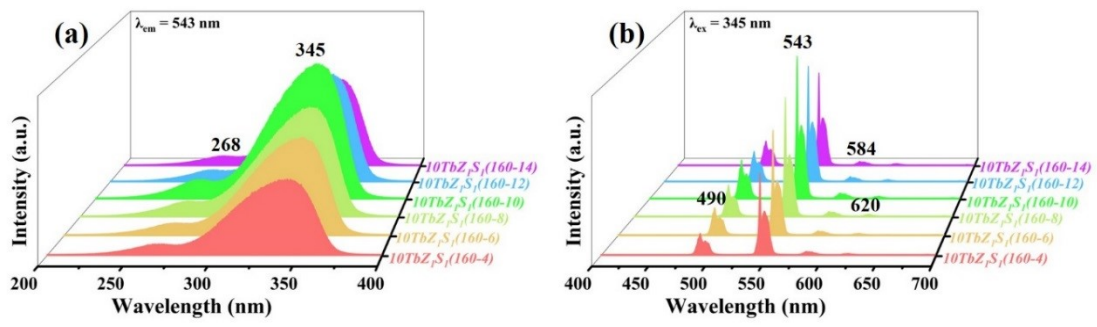

**Fig. S4** The excitation spectrum (a) and emission spectrum (b) of  $10\text{TbZ}_1\text{S}_1(160-t)$ ,  $t=4-14$ .

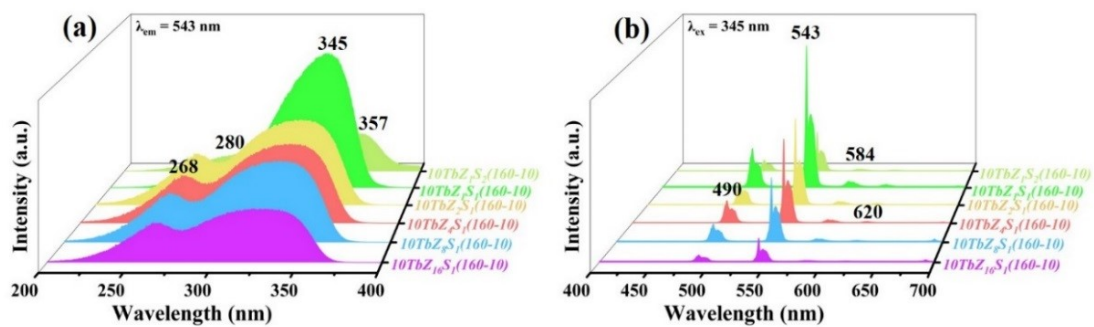

**Fig. S5** The excitation spectrum (a) and emission spectrum (b) of  $10\text{TbZ}_x\text{S}_y(160-10)$ ,  $x=1-16$ ,  $y=1-2$ .

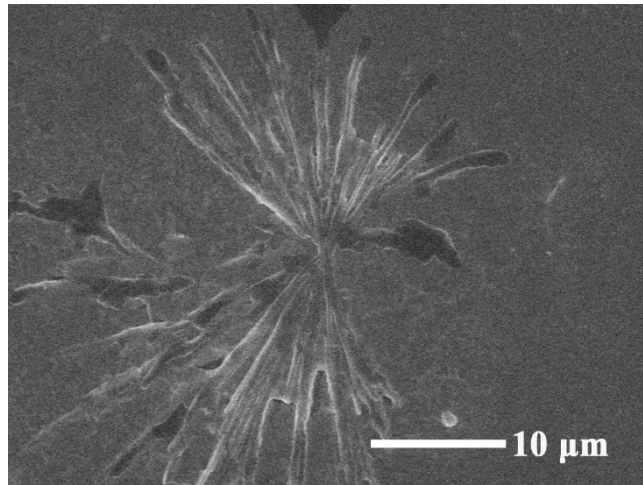

**Fig. S6** The SEM images of Tb complex.

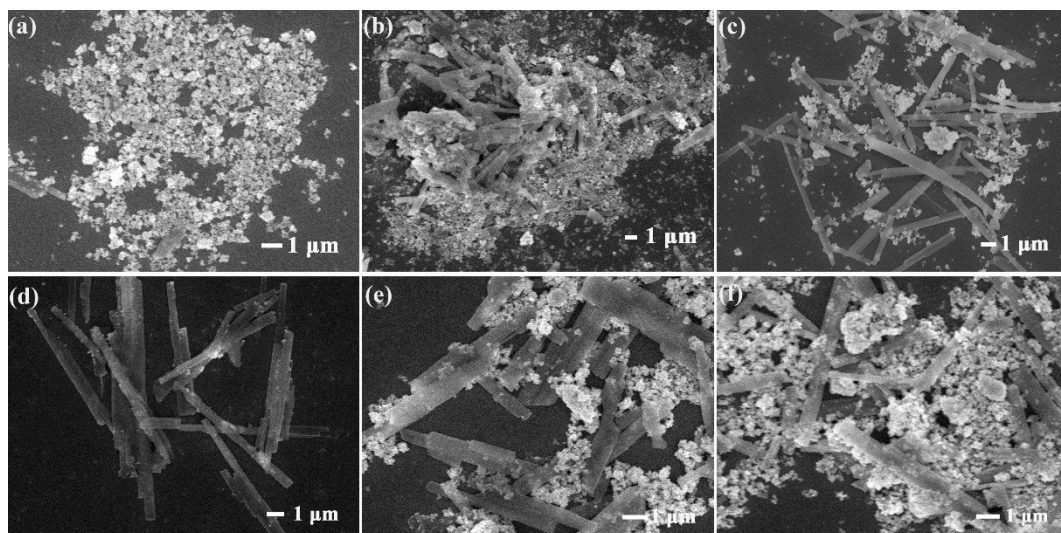

**Fig. S7** The SEM images of  $m\text{TbZ}_1\text{S}_1(160-10)$ , (a)  $m=4$ ; (b)  $m=6$ ; (c)  $m=8$ ; (d)  $m=10$ ; (e)  $m=12$ ; (f)  $m=14$ .



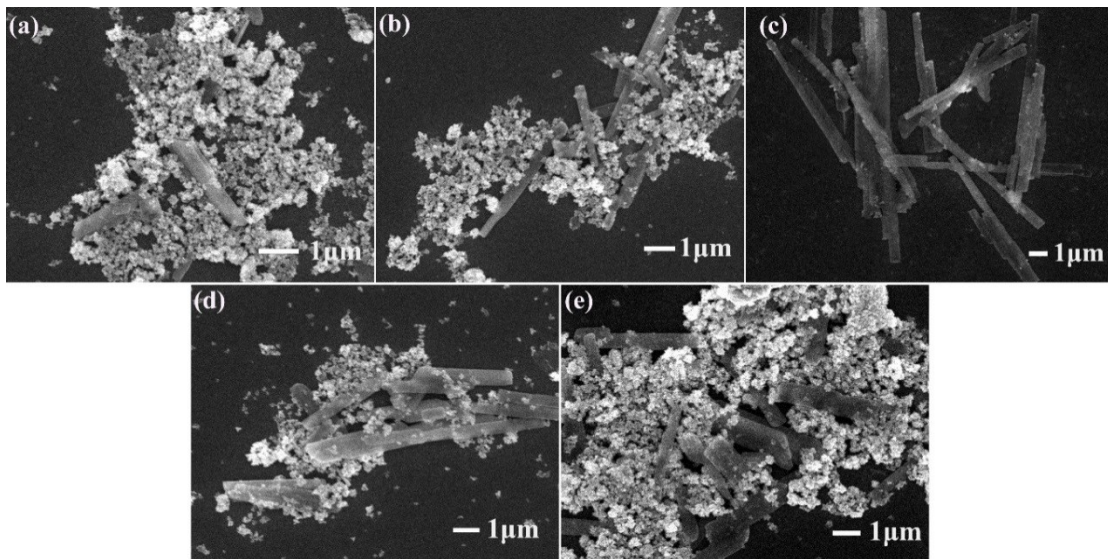

**Fig. S8** The SEM images of 10TbZ<sub>1</sub>S<sub>1</sub>(T-10), (a) T=14°C; (b) T=150°C; (c) T=160°C; (d) T=170°C; (e) T=180°C.

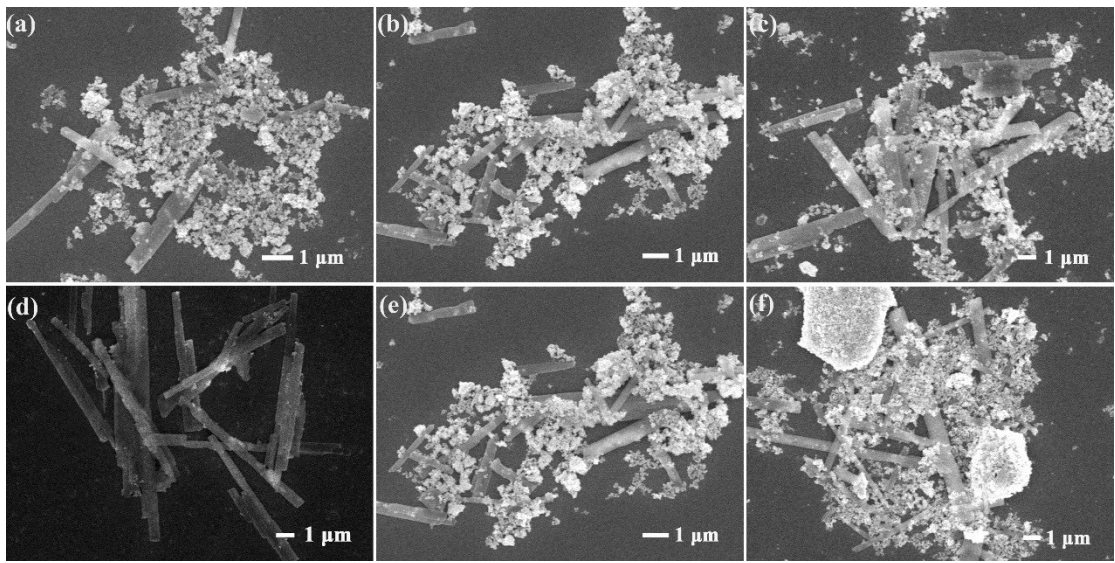

**Fig. S9** The SEM images of 10TbZ<sub>1</sub>S<sub>1</sub>(160-t), (a) t =4 h; (b) t =6 h; (c) t =8 h; (d) t =10 h; (e) t =12 h; (f) t =14 h.

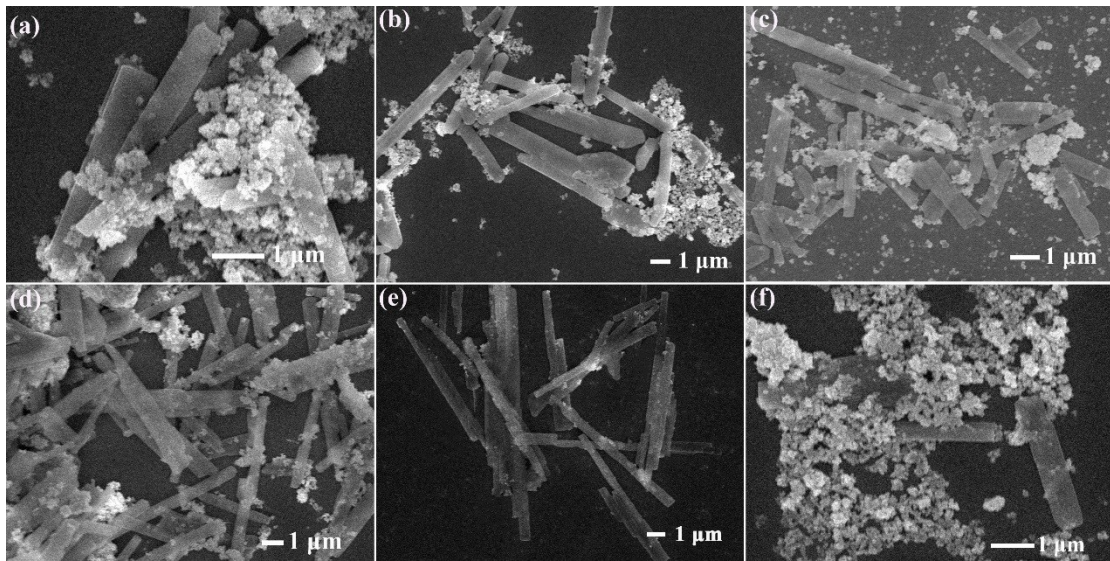

**Fig. S10** The SEM images of 10TbZ<sub>x</sub>S<sub>y</sub>(160-10), (a) x:y = 16:1, (b) x:y = 8 :1, (c) x:y = 4:1, (d) x:y = 2:1, (e) x:y = 1:1, (f) x:y = 1:2.

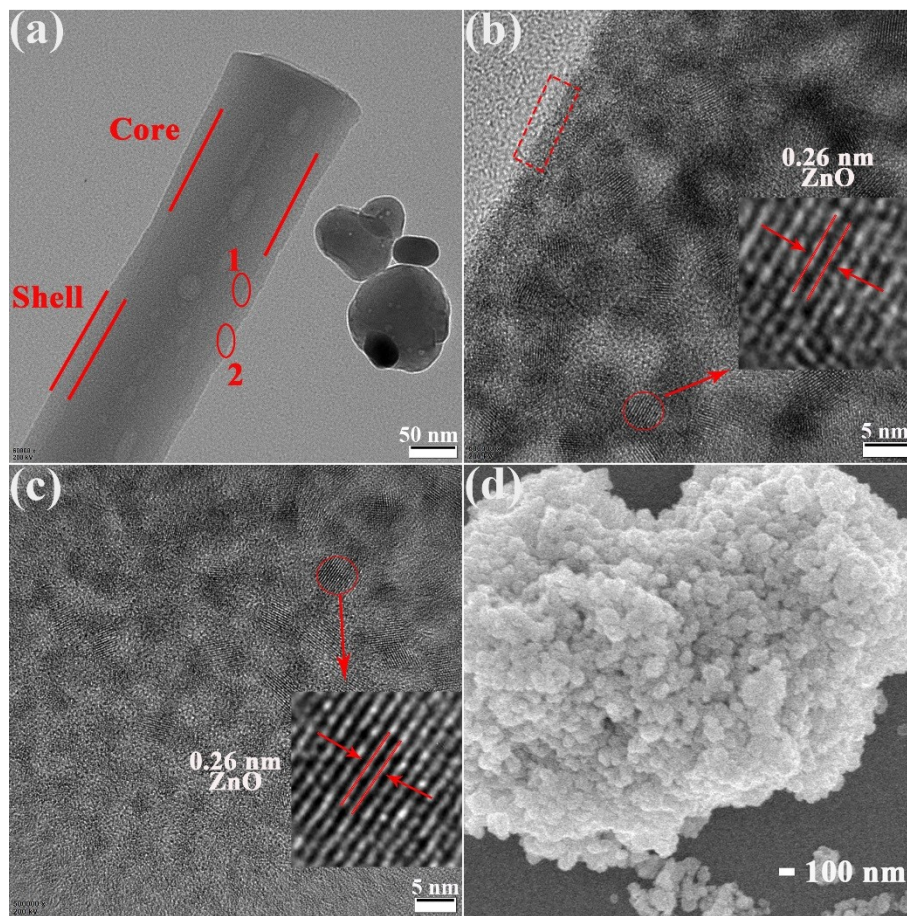

**Fig. S11** The TEM image (a) and HRTEM (b: region 1, c: region 2) of 10TbZ(160-10), the SEM image of 10TbS(160-10).

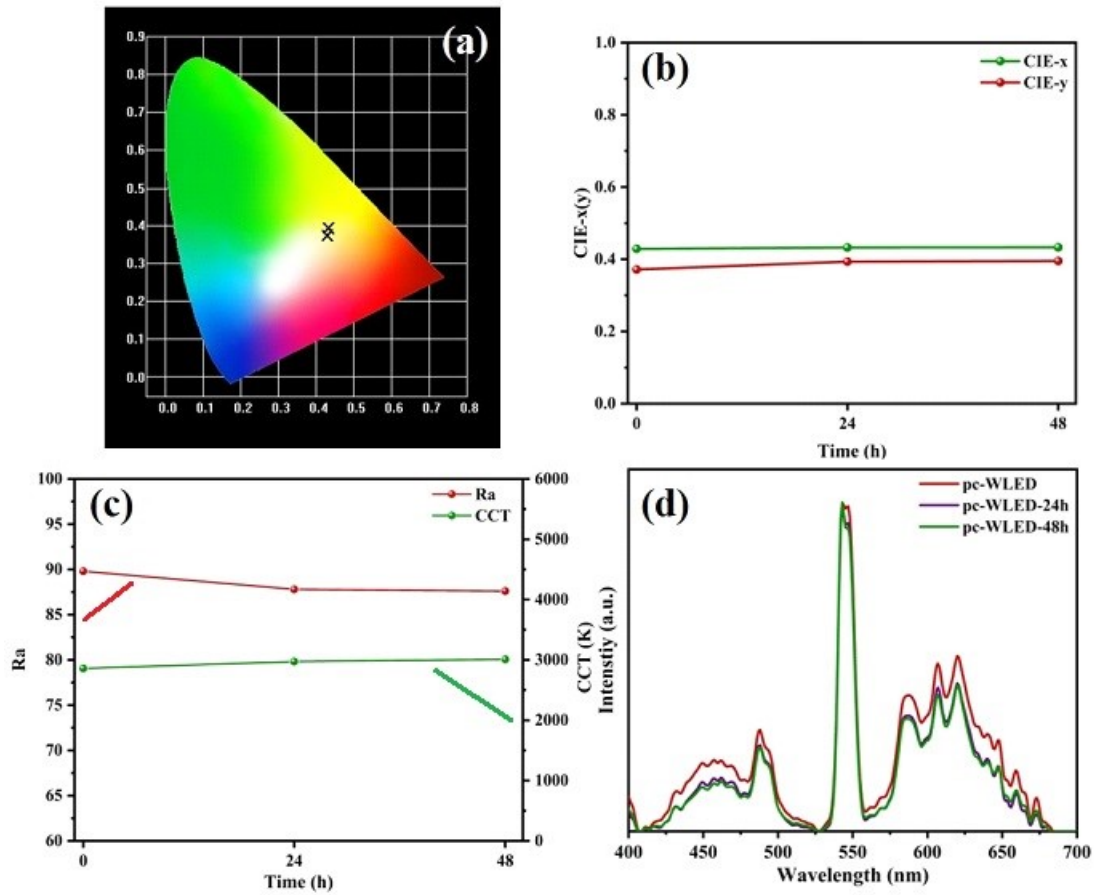

**Fig. S12** CIE diagram (a), Line chart of CIE-x and CIE-y (b), Line chart of correlation color temperature (CCT) and color purity (Ra) (c) and Emission spectrum (d) of the pc-WLED illuminated for different times under a continuous driving current of 20 mA.
